# Supplementary material for: A novel colorimetric sensing platform for the detection ofS. aureuswith high sensitivity and specificity
Source: Royal Society of Chemistry journal article supplement (doi:10.1039/c9ra05304b), 2019-01-01
Supplement: c9ra05304b1.pdf [file c9ra05304b1.pdf]

1

## Supplementary Information

2 **A novel colorimetric sensing platform for the detection of *S. aureus* with high sensitivity and**  
3 **specificity**

4 Yun Zhang <sup>a,1,\*</sup>, Shuyou Shi <sup>a,1</sup>, Jiajia Xing <sup>b</sup>, Wenqing Tan <sup>a</sup>, Chenguang Zhang <sup>a</sup>, Lin Zhang <sup>c</sup>, Huan  
5 Yuan <sup>a</sup>, Miaomiao Zhang <sup>a</sup>, Jinjuan Qiao <sup>d</sup>

6

7 <sup>a</sup> Henan Key Laboratory of Immunology and Targeted Therapy, Henan Collaborative Innovation Center  
8 of Molecular Diagnosis and Laboratory Medicine, School of Laboratory Medicine, Xinxiang Medical  
9 University, Xinxiang 453003, PR China

10 <sup>b</sup> School of International Education, Xinxiang Medical University, Xinxiang 453003, PR China

11 <sup>c</sup> School of Innovation and Entrepreneurship, Xinxiang Medical University, Xinxiang 453003, PR China

12 <sup>d</sup> Department of Medical Laboratory, Weifang Medical University, Weifang 261053, PR China

13

14 <sup>1</sup> these authors contributed equally to this work

15

16 \*Corresponding authors: Yun Zhang, Tel: +86 373 3029977; Fax: + 86 373 3029977; Email:

17 [zhangyun0126@126.com](mailto:zhangyun0126@126.com)

18

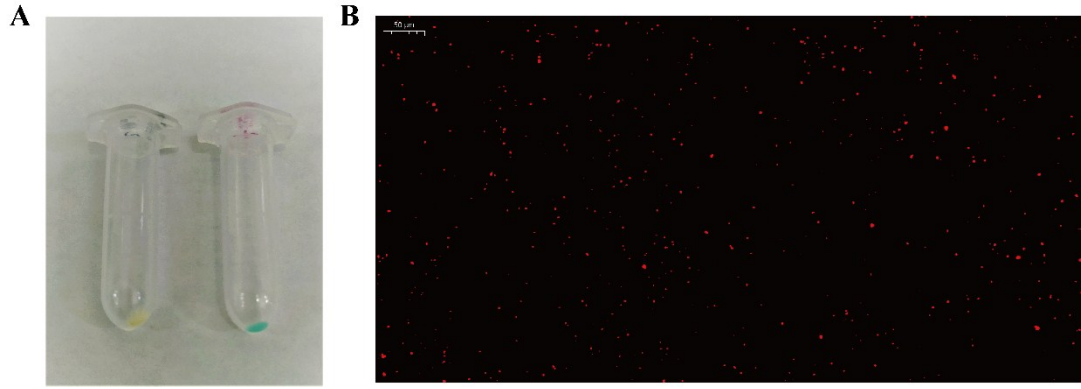

19

20 **Fig. S1** (A) The image of blue bacteria pellet of Cy5.5 binding *S. aureus* after centrifuge. (B)

21 Fluorescence micrographs of Cy5.5-stained *S. aureus*. Bar size: 50  $\mu\text{m}$

22

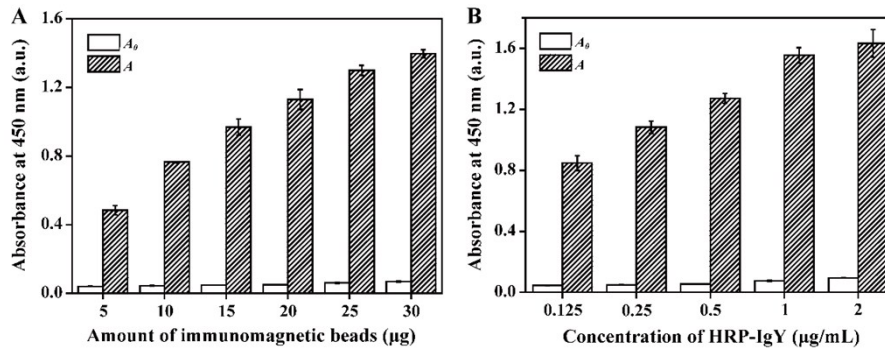

23

24 **Fig. S2** Effects of experimental conditions on signals of the system. Three independent measurements

25 were taken from three individual preparations for each condition. Error bars indicated the standard

26 deviations

27

**Table S1** Standard deviation test data of negative control

---

| No. | Absorbance at 450 nm (a.u.) |
|-----|-----------------------------|
| 1   | 0.049                       |
| 2   | 0.05                        |
| 3   | 0.051                       |
| 4   | 0.051                       |
| 5   | 0.052                       |
| 6   | 0.052                       |
| 7   | 0.052                       |
| 8   | 0.052                       |
| 9   | 0.052                       |
| 10  | 0.057                       |

---

**Table S2** Relative standard deviation test data for reproducibility

---

| No. | Absorbance at 450 nm (a.u.) |
|-----|-----------------------------|
| 1   | 1.218                       |
| 2   | 1.22                        |
| 3   | 1.222                       |
| 4   | 1.241                       |
| 5   | 1.241                       |
| 6   | 1.267                       |
| 7   | 1.267                       |
| 8   | 1.293                       |
| 9   | 1.334                       |
| 10  | 1.250                       |
| 11  | 1.356                       |

---

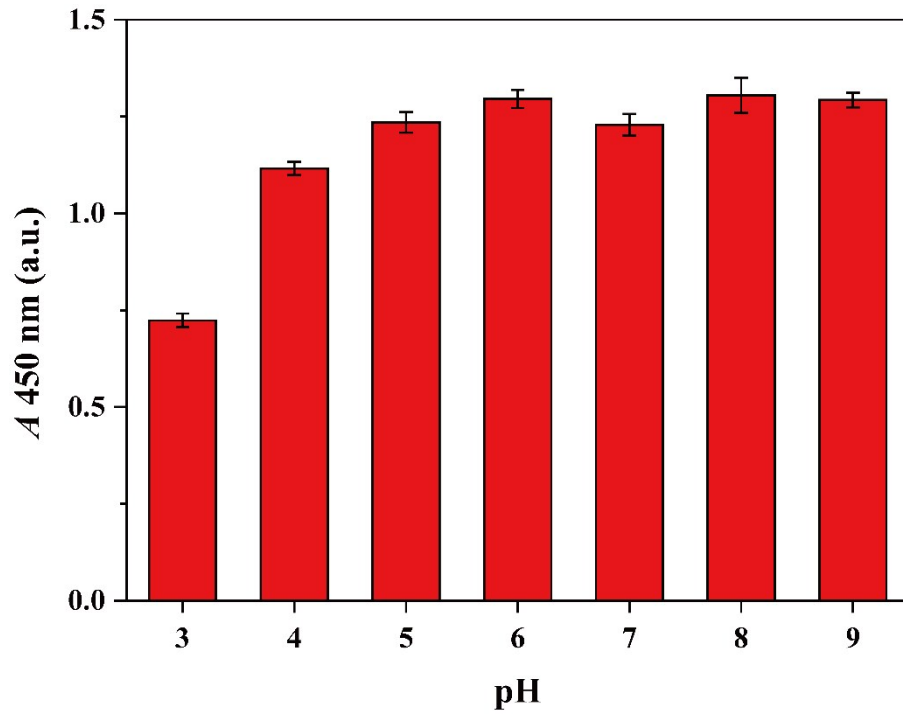

34

35 **Fig. S3** Effect of pH on the performance of the proposed method. Red bars indicated absorbance intensity  
36 (450 nm) (from left to right) for  $2.0 \times 10^5$  CFU/mL *S. aureus* in buffer solutions over a range of pH values  
37 3-9. Error bars indicated the standard deviations

38

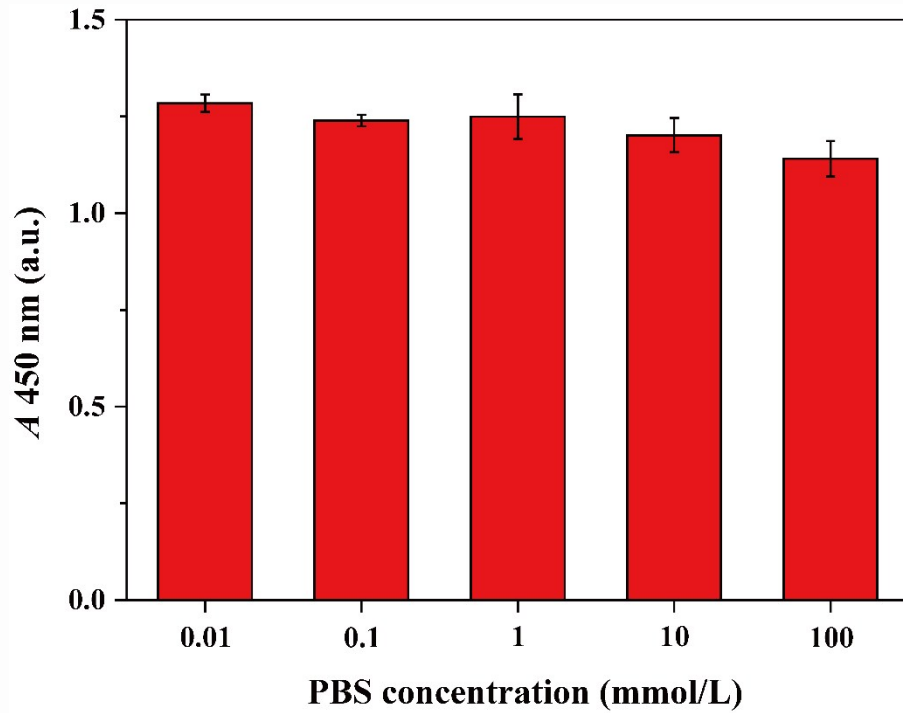

39

40 **Fig. S4** Effect of salt concentration of buffer solution on the performance of the proposed method. Red  
41 bars indicated absorbance intensity (450 nm) (from left to right) for  $2.0 \times 10^5$  CFU/mL *S. aureus* in buffer  
42 solutions over a range of PBS concentrations (0.01 – 100 mmol/L). Error bars indicated the standard  
43 deviations

44

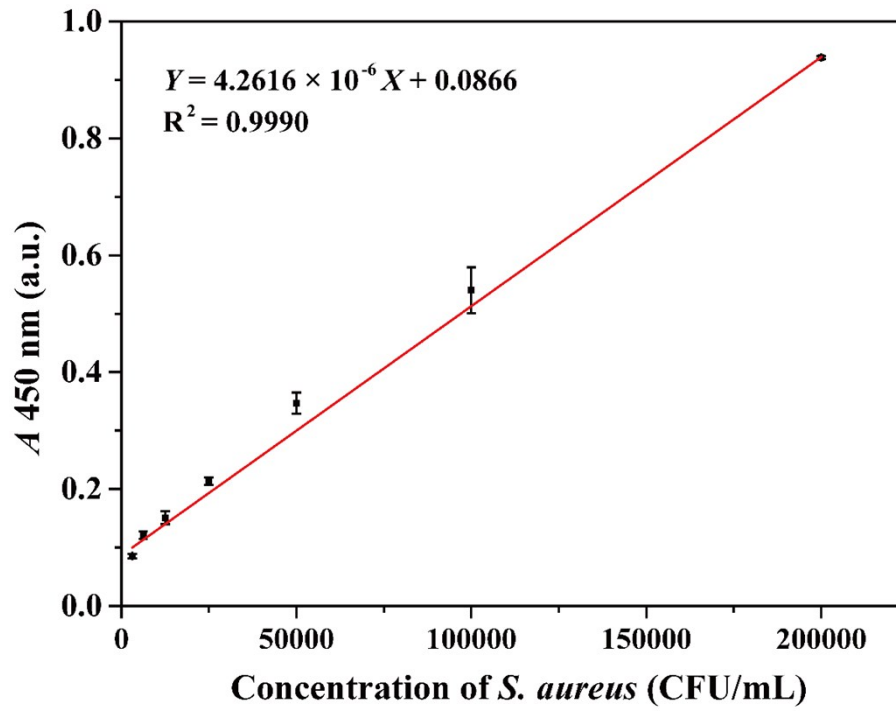

45

46 **Fig. S5** Calibration curve of absorbance intensity (450 nm) along with *S. aureus* concentration under the  
47 optimal conditions in orange juice (the sample was 5-time diluted). Three independent measurements  
48 were taken from three individual preparations for each condition. Error bars indicated the standard  
49 deviations

50



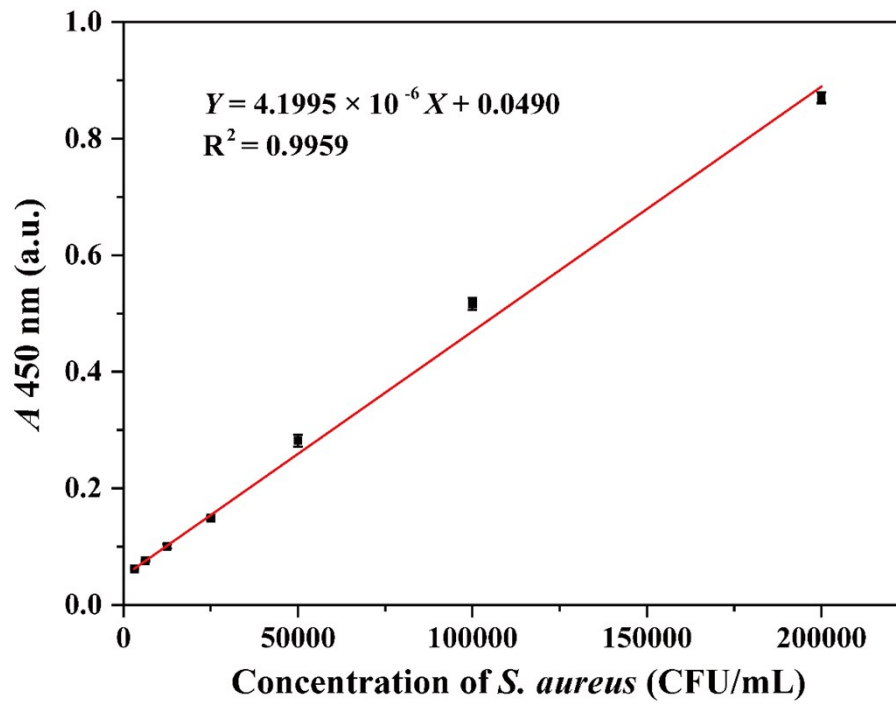

51

52 **Fig. S6** Calibration curve of absorbance intensity (450 nm) along with *S. aureus* concentration under the

53 optimal conditions in spring water. Three independent measurements were taken from three individual

54 preparations for each condition. Error bars indicated the standard deviations

55

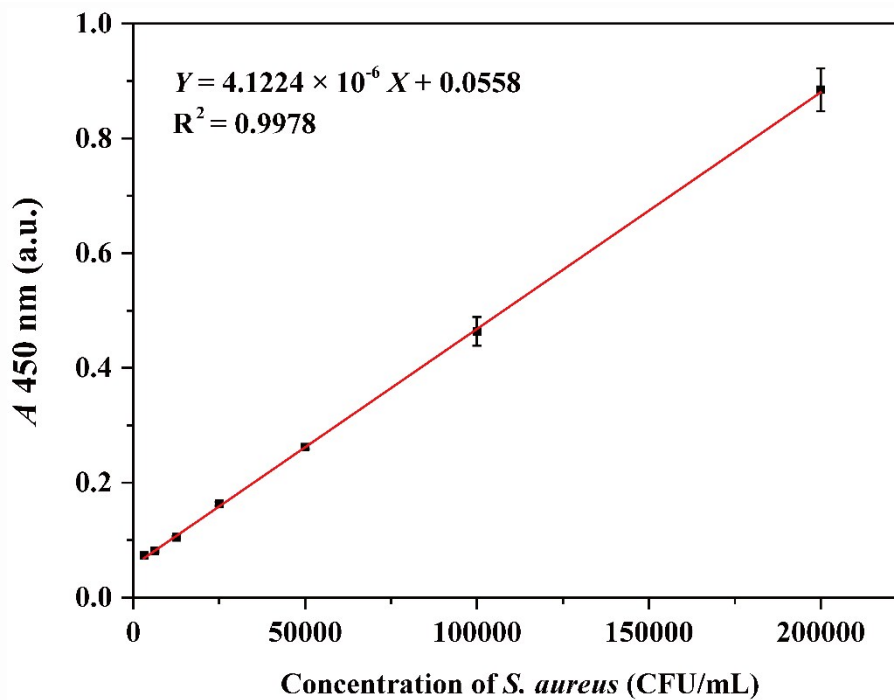

56

57 **Fig. S7** Calibration curve of absorbance intensity (450 nm) along with *S. aureus* concentration under the  
58 optimal conditions in human urine. Three independent measurements were taken from three individual  
59 preparations for each condition. Error bars indicated the standard deviations

60

61 **Table S3** Analytical results of *S. aureus* in real samples obtained using the proposed method and by

62 ELISA (n=3)

| <b>Samples</b>            | <b>Spiked<br/>(CFU mL<sup>-1</sup>)</b> | <b>Found<br/>(CFU mL<sup>-1</sup>)</b> | <b>RSD<br/>(%)</b> | <b>ELISA<br/>(CFU mL<sup>-1</sup>)</b> | <b>RSD<br/>(%)</b> |
|---------------------------|-----------------------------------------|----------------------------------------|--------------------|----------------------------------------|--------------------|
| Orange juice <sup>a</sup> | 1.3 × 10 <sup>4</sup>                   | 1.4 × 10 <sup>4</sup>                  | 6.32               | 1.2 × 10 <sup>4</sup>                  | 2.31               |
|                           | 5.0 × 10 <sup>4</sup>                   | 5.5 × 10 <sup>4</sup>                  | 7.21               | 5.4 × 10 <sup>4</sup>                  | 4.42               |
| Spring water              | 1.3 × 10 <sup>4</sup>                   | 1.2 × 10 <sup>4</sup>                  | 6.87               | 1.1 × 10 <sup>4</sup>                  | 2.21               |
|                           | 5.0 × 10 <sup>4</sup>                   | 5.2 × 10 <sup>4</sup>                  | 4.35               | 4.7 × 10 <sup>4</sup>                  | 2.87               |
| Human urine <sup>b</sup>  | 1.3 × 10 <sup>4</sup>                   | 1.2 × 10 <sup>4</sup>                  | 3.52               | 1.3 × 10 <sup>4</sup>                  | 2.39               |
|                           | 5.0 × 10 <sup>4</sup>                   | 5.0 × 10 <sup>4</sup>                  | 1.75               | 5.5 × 10 <sup>4</sup>                  | 1.09               |

63 <sup>a</sup> The sample was 5 times diluted. <sup>b</sup> The sample was 10 times diluted.

64

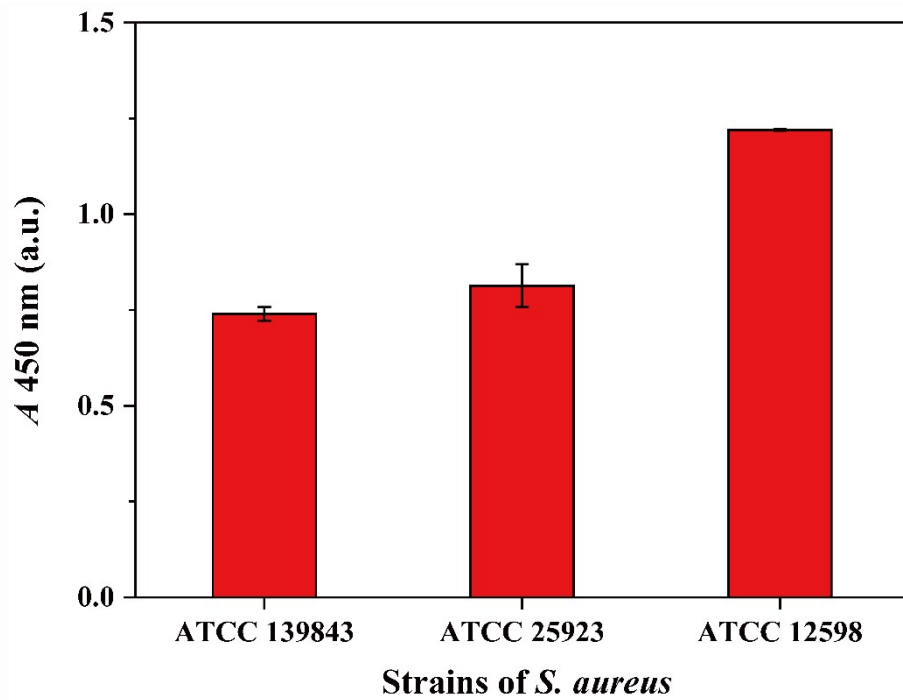

65

66 **Fig. S8** Different strains of *S. aureus* detected by the proposed method. Red bars indicated absorbance

67 intensity (450 nm) (from left to right) for  $2.0 \times 10^5$  CFU/mL *S. aureus* (ATCC 139843), *S. aureus* (ATCC

68 25923) and *S. aureus* (ATCC 12598). Error bars indicated the standard deviations
